# Supplementary material for: Synthesis and characterization of protic ionic liquids as thermoelectrochemical materials
Source: Royal Society of Chemistry journal article supplement (doi:10.1039/c5ra24835c), 2016-01-01
Supplement: c5ra24835c1.pdf [file c5ra24835c1.pdf]

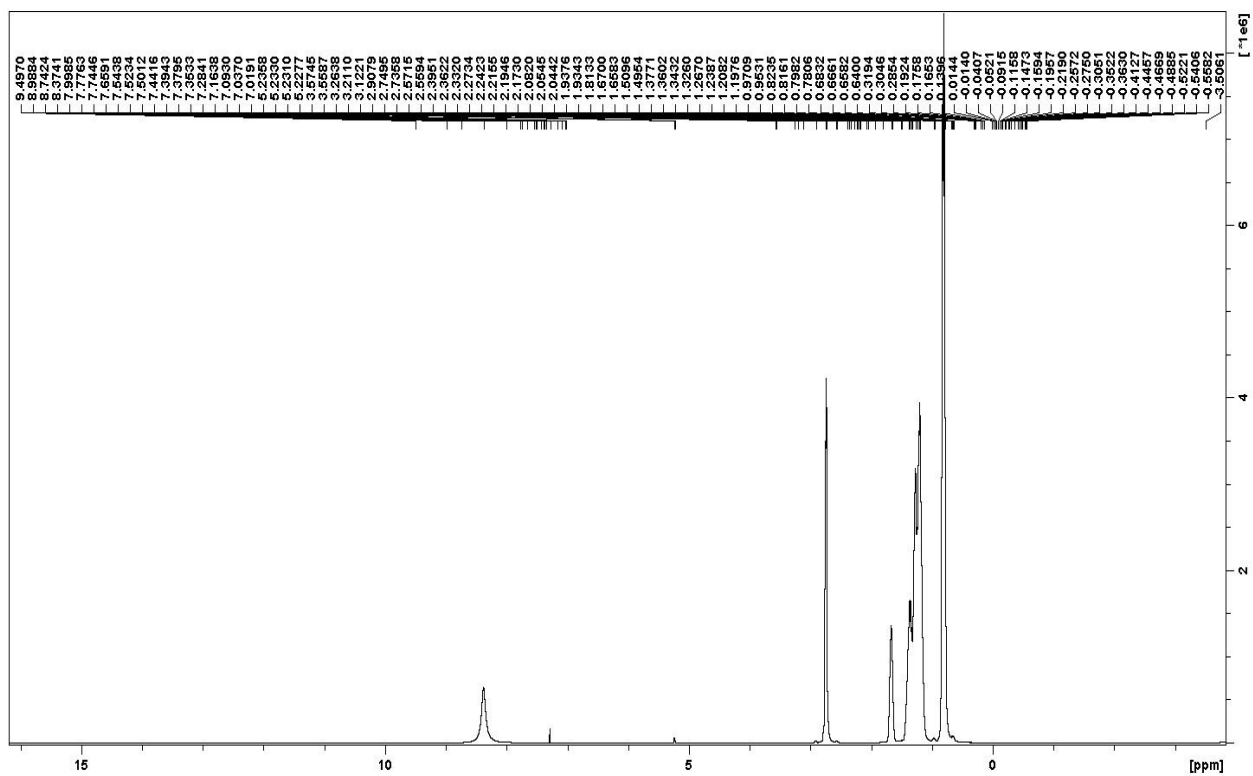

Figure: <sup>1</sup>H-NMR of BEHA TFA

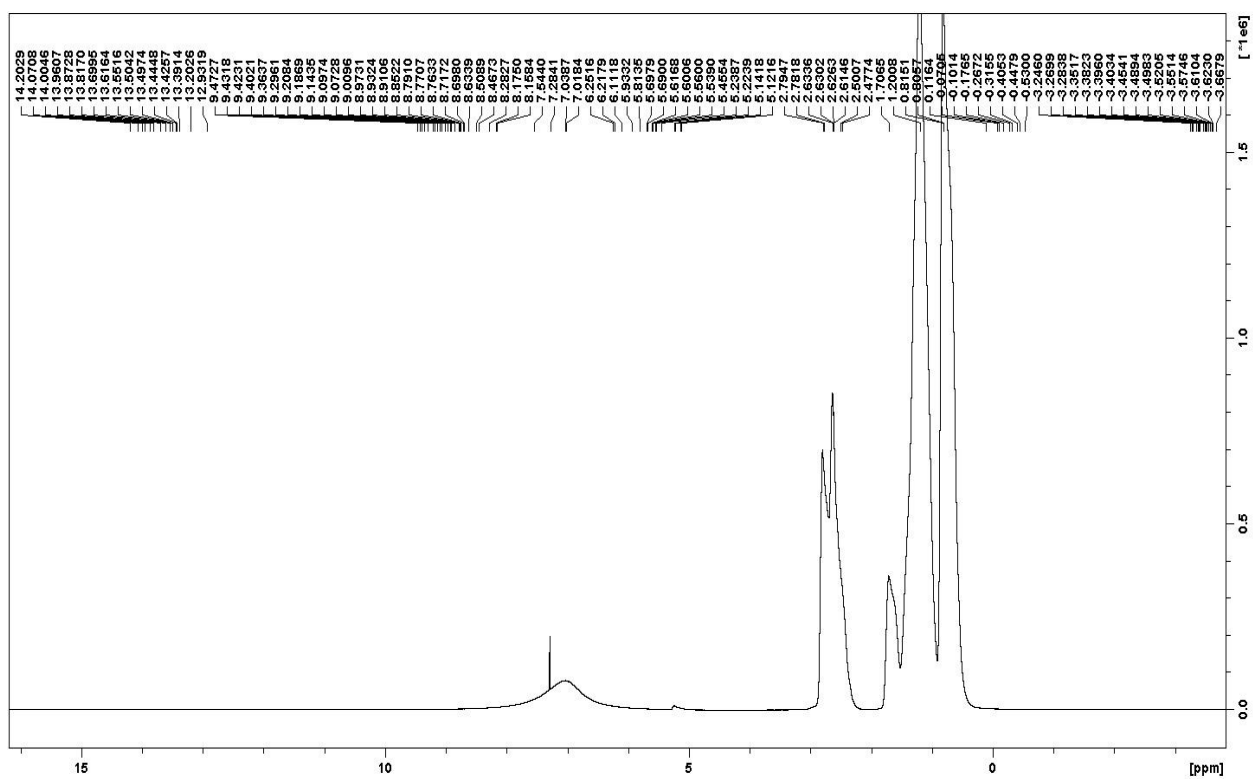

Figure: <sup>1</sup>H-NMR of BEHA MS

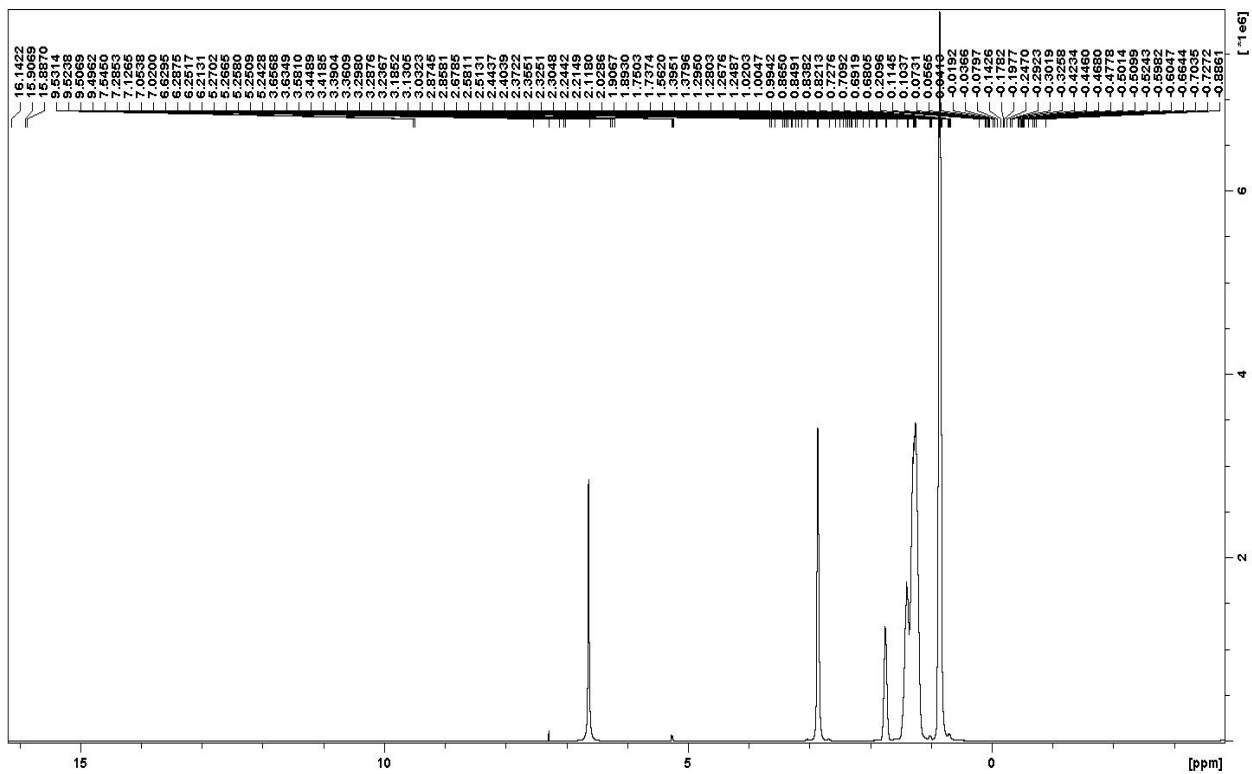

Figure:  $^1\text{H-NMR}$  of BEHA TFMS

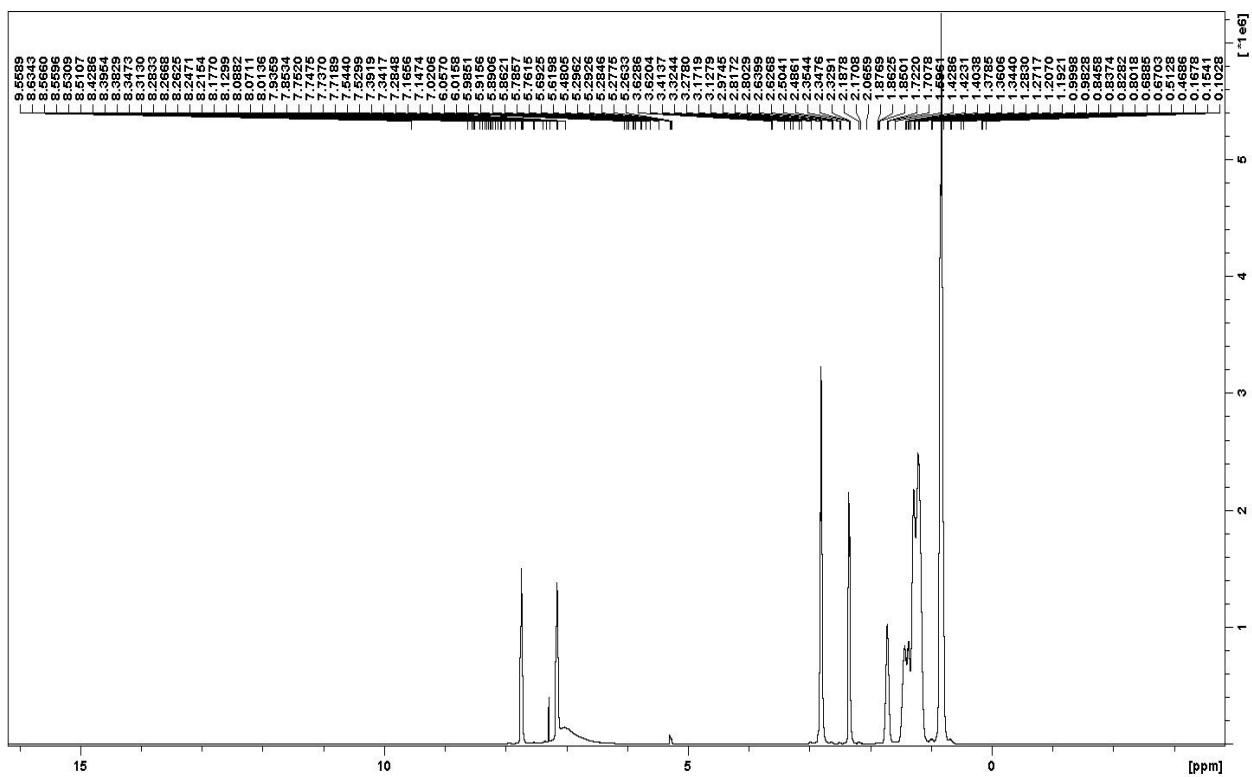

Figure:  $^1\text{H-NMR}$  of BEHA Tosylate

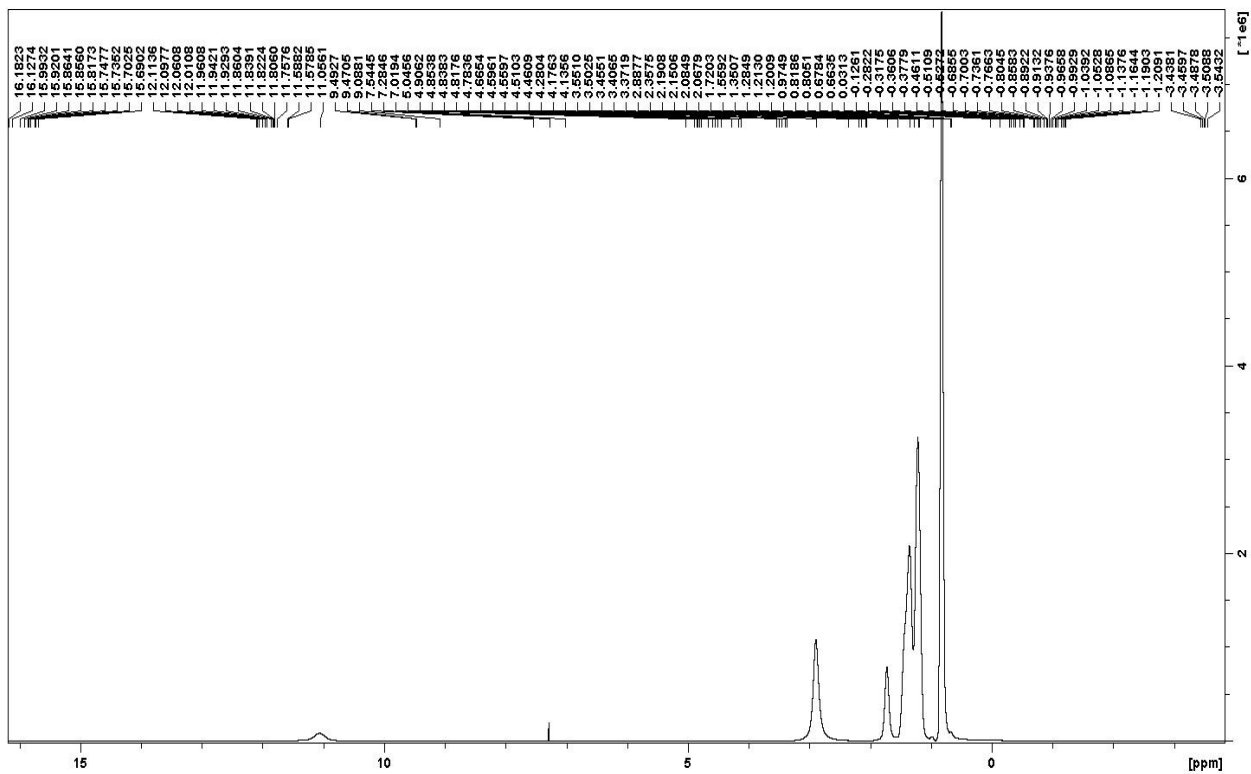

Figure: <sup>1</sup>H-NMR of TEHA TFA

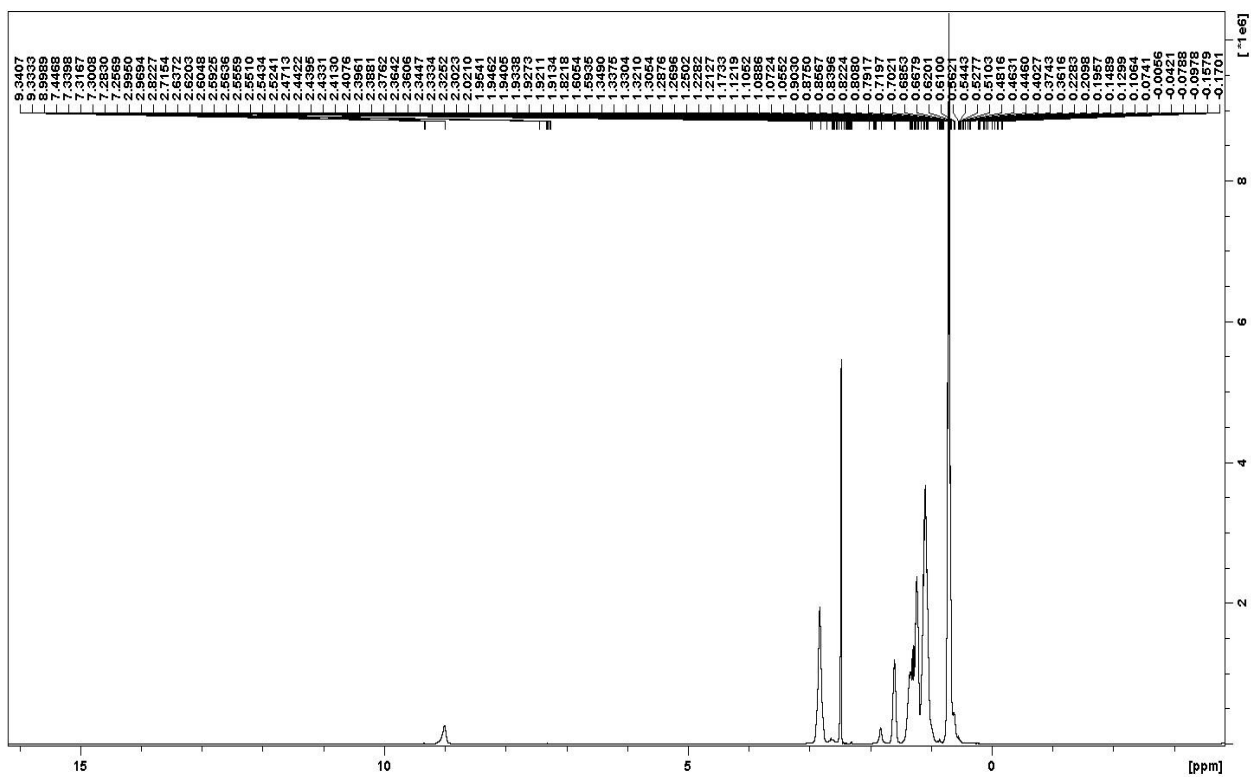

Figure: <sup>1</sup>H-NMR of TEHA MS

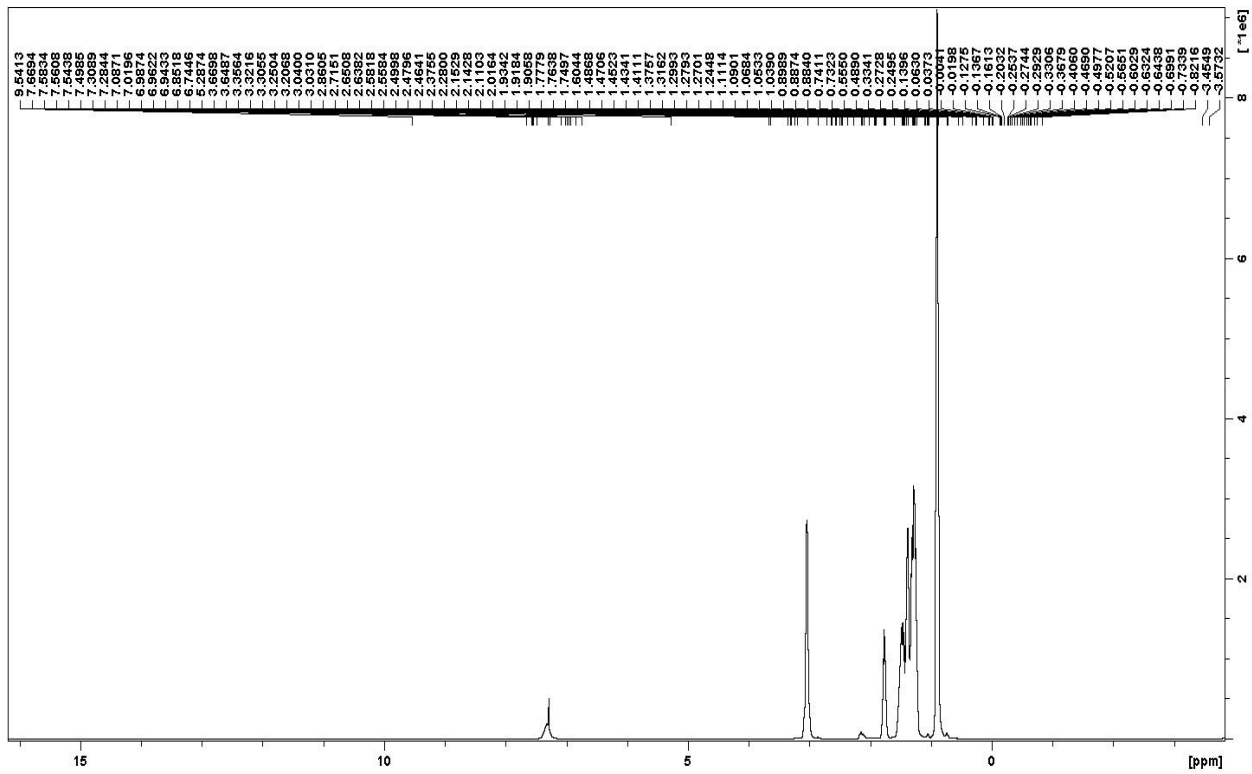

Figure: <sup>1</sup>H-NMR of TEHA TFMS

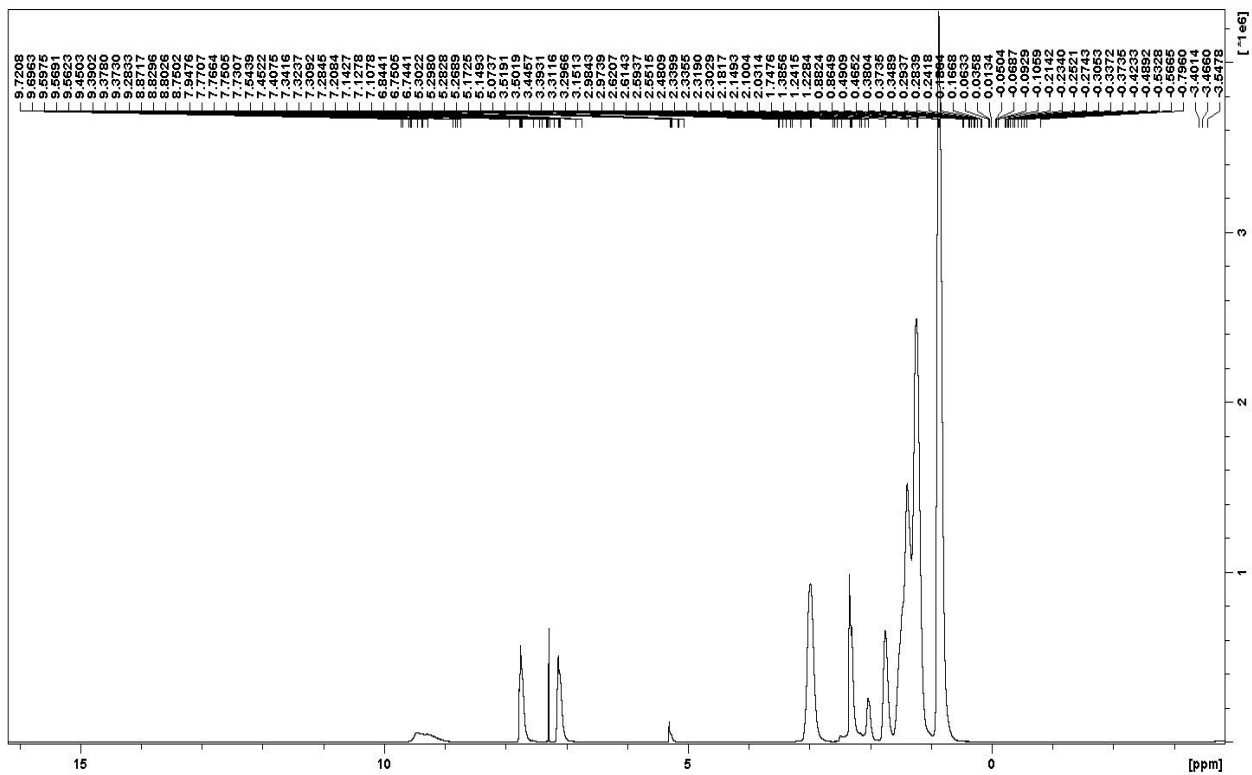

Figure: <sup>1</sup>H-NMR of TEHA Tosylate

**Table:** Density, refractive index and viscosity of synthesized PILs at various temperature.

| Temperature (°C)                                     | BEHA TFA | BEHA MS | BEHA<br>TFMS | BEHA<br>Tosylate | TEHA TFA | TEHA MS | TEHA<br>TFMS | TEHA<br>Tosylate |
|------------------------------------------------------|----------|---------|--------------|------------------|----------|---------|--------------|------------------|
| <b>Density, <math>\rho</math> (g/cm<sup>3</sup>)</b> |          |         |              |                  |          |         |              |                  |
| 20                                                   | --       | 0.9806  | 1.0635       | 0.9995           | 0.9553   | 0.9387  | 1.0164       | 0.9648           |
| 30                                                   | --       | 0.9737  | 1.0558       | 0.9927           | 0.9475   | 0.9322  | 1.0094       | 0.9583           |
| 40                                                   | --       | 0.9668  | 1.0480       | 0.9859           | 0.9396   | 0.9256  | 1.0024       | 0.9517           |
| 50                                                   | 0.9667   | 0.9600  | 1.0403       | 0.9792           | 0.9317   | 0.9189  | 0.9954       | 0.9452           |
| 60                                                   | 0.9587   | 0.9531  | 1.0327       | 0.9724           | 0.9238   | 0.9121  | 0.9884       | 0.9388           |
| 70                                                   | 0.9508   | 0.9464  | 1.0251       | 0.9656           | 0.9159   | 0.9053  | 0.9814       | 0.9323           |
| 80                                                   | 0.9429   | 0.9396  | 1.0176       | 0.9590           | 0.9080   | 0.8984  | 0.9745       | 0.9258           |
| 90                                                   | 0.9351   | 0.9330  | 1.0101       | 0.9523           | 0.9000   | 0.8914  | 0.9676       | 0.9193           |
| <b>Refractive index, <math>n_D</math> (unit)</b>     |          |         |              |                  |          |         |              |                  |
| 20                                                   | --       | 1.4615  | 1.436        | 1.4924           | 1.4419   | 1.4652  | 1.4469       | 1.4869           |
| 30                                                   | --       | 1.4581  | 1.4327       | 1.4888           | 1.4381   | 1.4619  | 1.4436       | 1.4838           |
| 40                                                   | --       | 1.4548  | 1.4294       | 1.4853           | 1.4343   | 1.4584  | 1.4403       | 1.4803           |
| 50                                                   | 1.4229   | 1.4515  | 1.4261       | 1.4818           | 1.4305   | 1.4550  | 1.4371       | 1.4769           |
| 60                                                   | 1.4193   | 1.4478  | 1.4228       | 1.4783           | 1.4268   | 1.4514  | 1.4339       | 1.4734           |
| 70                                                   | 1.4156   | 1.4445  | 1.4196       | 1.4746           | 1.4231   | 1.4476  | 1.4307       | 1.4699           |
| 80                                                   | 1.4120   | 1.4414  | 1.4163       | 1.4713           | 1.4194   | 1.4440  | 1.4275       | 1.4664           |
| 90                                                   | 1.4084   | 1.4382  | 1.413        | 1.4679           | 1.4156   | 1.4407  | 1.4243       | 1.4632           |
| <b>Viscosity, <math>\eta</math> (Pa.s)</b>           |          |         |              |                  |          |         |              |                  |
| 20                                                   | --       | 1.07    | 0.622        | 1.74             | 0.357    | 2.41    | 1.72         | 4.3584           |
| 30                                                   | --       | 0.635   | 0.382        | 1                | 0.216    | 1.38    | 1.02         | 2.47             |
| 40                                                   | --       | 0.331   | 0.209        | 0.503            | 0.116    | 0.69    | 0.535        | 1.25             |
| 50                                                   | 0.051    | 0.184   | 0.122        | 0.27             | 0.0662   | 0.367   | 0.298        | 0.653            |
| 60                                                   | 0.0319   | 0.11    | 0.0755       | 0.157            | 0.0405   | 0.206   | 0.176        | 0.367            |
| 70                                                   | 0.0211   | 0.0695  | 0.0496       | 0.0977           | 0.0263   | 0.123   | 0.11         | 0.221            |
| 80                                                   | 0.015    | 0.0454  | 0.0343       | 0.0627           | 0.0179   | 0.0751  | 0.0702       | 0.139            |
| 90                                                   | 0.0109   | 0.032   | 0.0241       | 0.0435           | 0.0124   | 0.0498  | 0.0483       | 0.0944           |

**Table:** Thermal Conductivity of the synthesized PILs

| PILs          | Thermal Conductivity, $\kappa$ (W/m.K) | Temperature (°C) |
|---------------|----------------------------------------|------------------|
| BEHA TFA      | 0.133                                  | 49.54            |
| BEHA MS       | 0.159                                  | 25.26            |
| BEHA TFMS     | 0.143                                  | 25.23            |
| BEHA Tosylate | 0.153                                  | 25.23            |
| TEHA TFA      | 0.138                                  | 25.25            |
| TEHA MS       | 0.150                                  | 25.26            |
| TEHA TFMS     | 0.135                                  | 25.25            |
| TEHA Tosylate | 0.146                                  | 25.2             |

**Table:** Ionic and Thermal conductivity of the fixed ratio of PILs and 0.05M  $I^-/I_3^-$ 

| Temperature (°C)                                         | BEHA TFA | BEHA MS | BEHA TFMS | BEHA Tosylate | TEHA TFA | TEHA MS | TEHA TFMS | TEHA Tosylate |
|----------------------------------------------------------|----------|---------|-----------|---------------|----------|---------|-----------|---------------|
| <b>Ionic Conductivity, <math>\sigma</math> (mS/cm)</b>   |          |         |           |               |          |         |           |               |
| 25                                                       | 1.444    | 1.22    | 2.45      | 0.753         | 2.27     | 0.837   | 1.382     | 0.667         |
| 30                                                       | 1.52     | 1.328   | 2.56      | 0.824         | 2.34     | 0.863   | 1.49      | 0.747         |
| 35                                                       | 1.555    | 1.44    | 2.75      | 0.898         | 2.45     | 0.963   | 1.61      | 0.827         |
| 40                                                       | 1.688    | 1.54    | 3.08      | 0.998         | 2.6      | 1.051   | 1.755     | 0.885         |
| 45                                                       | 1.826    | 1.636   | 3.37      | 1.122         | 2.8      | 1.13    | 1.84      | 0.965         |
| 50                                                       | 1.879    | 1.738   | 3.75      | 1.213         | 2.99     | 1.226   | 2.02      | 1.038         |
| 55                                                       | 2        | 1.838   | 4.09      | 1.323         | 3.21     | 1.365   | 2.24      | 1.102         |
| 60                                                       | 2.13     | 2.02    | 4.36      | 1.438         | 3.46     | 1.45    | 2.47      | 1.2           |
| 65                                                       | 2.23     | 2.19    | 4.62      | 1.51          | 3.64     | 1.51    | 2.67      | 1.27          |
| 70                                                       | 2.34     | 2.26    | 4.93      | 1.627         | 3.85     | 1.635   | 2.9       | 1.388         |
| <b>Thermal Conductivity, <math>\kappa</math> (W/m.K)</b> |          |         |           |               |          |         |           |               |
| 20                                                       | 0.0365   | 0.039   | 0.035     | 0.033         | 0.0375   | 0.039   | 0.036     | 0.041         |
| 30                                                       | 0.037    | 0.0395  | 0.036     | 0.034         | 0.038    | 0.0395  | 0.037     | 0.042         |
| 40                                                       | 0.0375   | 0.04    | 0.037     | 0.035         | 0.0385   | 0.04    | 0.038     | 0.043         |
| 50                                                       | 0.038    | 0.0405  | 0.038     | 0.036         | 0.039    | 0.041   | 0.0385    | 0.044         |
| 60                                                       | 0.039    | 0.041   | 0.039     | 0.03633       | 0.0395   | 0.0415  | 0.039     | 0.045         |
| 70                                                       | 0.0395   | 0.0415  | 0.04      | 0.03667       | 0.04     | 0.042   | 0.0395    | 0.046         |
